# Supplementary material for: New insights on the nature of impurity levels in V-doped In2S3: why is it impossible to obtain a metallic intermediate band?
Source: Royal Society of Chemistry journal article supplement (doi:10.1039/c9ta01629e), 2019-01-01
Supplement: c9ta01629e1.pdf [file c9ta01629e1.pdf]

*Supplementary information:*

New insights on the nature of impurity levels  
in V-doped  $\text{In}_2\text{S}_3$ : Why is it impossible to  
obtain a metallic intermediate band?

Elaheh Ghorbani,<sup>\*,†</sup> Paul Erhart,<sup>‡</sup> and Karsten Albe<sup>†</sup>

<sup>†</sup>*Fachgebiet Materialmodellierung, Institut für Materialwissenschaft, TU Darmstadt,  
Otto-Berndt-Straße 3, D-64287 Darmstadt, Germany*

<sup>‡</sup>*Department of Physics, Chalmers University of Technology, SE-412 96 Gothenburg,  
Sweden*

E-mail: ghorbani@mm.tu-darmstadt.de

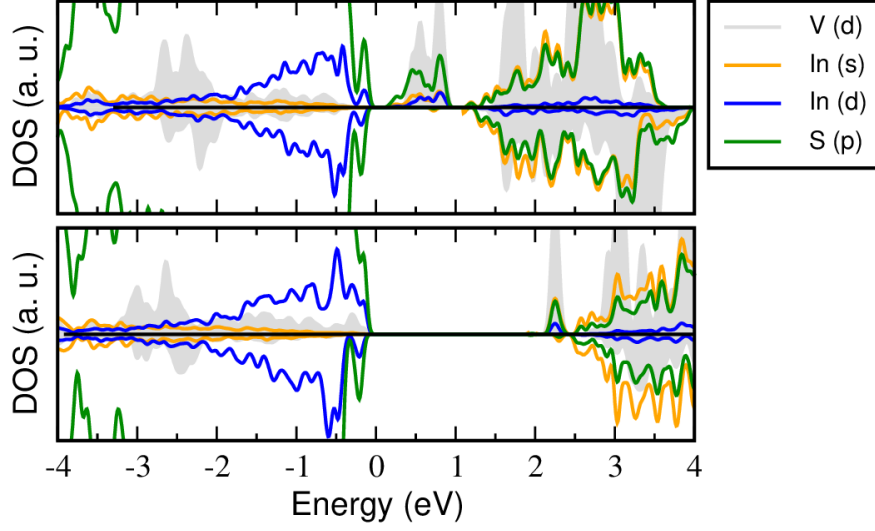

Figure S1: Spin-polarized local densities of states of  $\text{In}_2\text{S}_3:\text{V}$  calculated with PBE (top panel) and HSE functionals (bottom panel). Four V atoms are added into four well-separated  $\text{In}^{8c}$  sites, creating isoelectronic  $\text{V}_{\text{In}}^0$  centers.

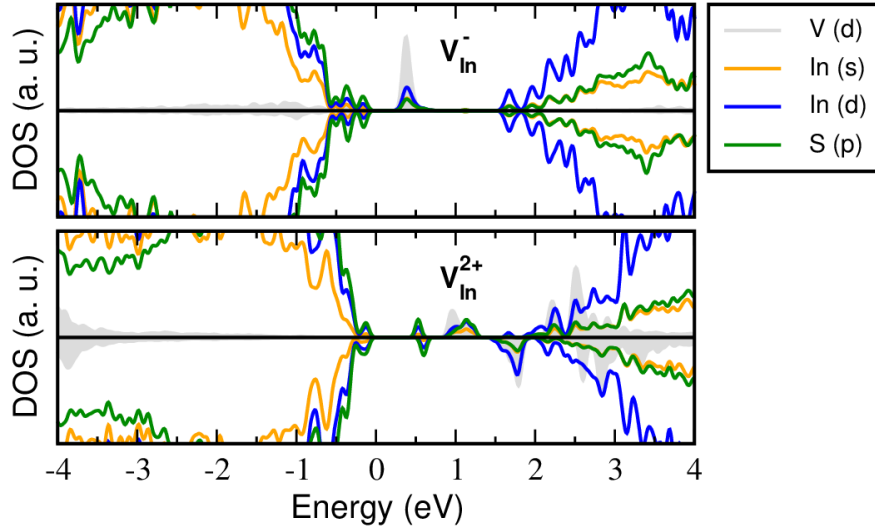

Figure S2: Spin-polarized densities of states of  $\text{In}_2\text{S}_3:\text{V}$ , when the incorporated V forms an acceptor ( $\text{V}_{\text{In}}^-$ ; top panel) or a double-donor center ( $\text{V}_{\text{In}}^{2+}$ ; bottom panel).

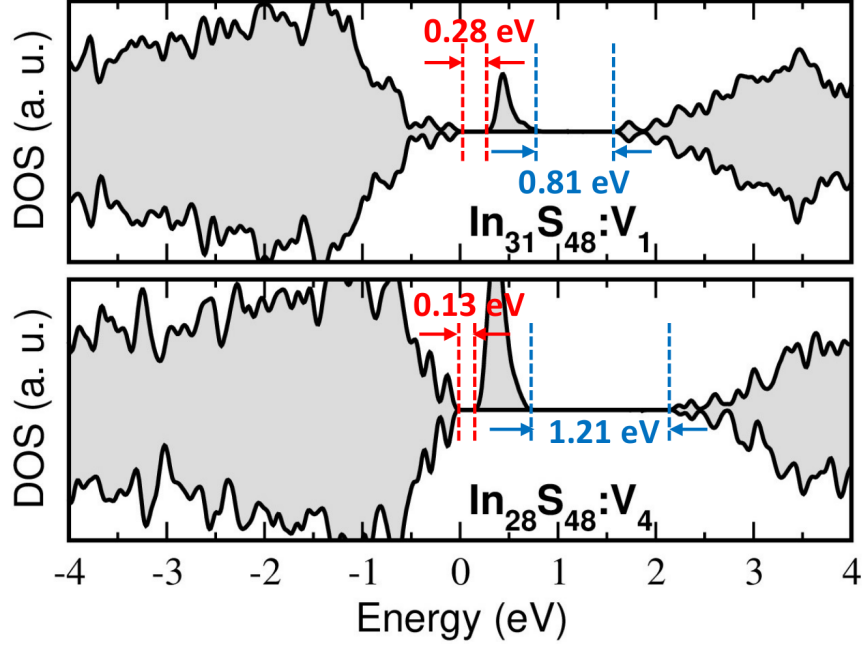

Figure S3: The HSE calculated spin-polarized total density of states of  $\text{In}_{31}\text{S}_{48}\text{V}_1^{16\text{h}}$  (top panel) and  $\text{In}_{28}\text{S}_{48}\text{V}_4^{16\text{h}}$  (bottom panel), when the incorporated V is on +II oxidation state. The zero of energy is set to the energy of the VBM obtained for each compound. For 1.25 at.% and 5 at.% vanadium, width of IB is 0.53 and 0.61 eV, respectively.

Table S1: Lattice parameters  $a$ ,  $b$ ,  $c$  and average (V-S) bond length (in Å) for various charge states of V on  $\text{In}^{16\text{h}}$  sites as calculated with HSE functional. The V concentration is 1.25 at.%.

| Charge state | $a$  | $b$  | $c$   | $d(\text{V}^{16\text{h}}-\text{S})$ |
|--------------|------|------|-------|-------------------------------------|
| $q=+2$       | 7.59 | 7.62 | 32.43 | 2.43                                |
| $q=+1$       | 7.64 | 7.63 | 32.49 | 2.44                                |
| $q=0$        | 7.67 | 7.66 | 32.75 | 2.50                                |
| $q=-1$       | 7.71 | 7.71 | 32.83 | 2.55                                |
